# Supplementary material
Source: PubMed Central journal article supplement (PMC6439853)
Supplement: jamasurg-e184234-s001.pdf [file jamasurg-e184234-s001.pdf]

## Supplementary Online Content

Howard R, Fry B, Gunaseelan V, et al. Association of opioid prescribing with opioid consumption after surgery in Michigan. *JAMA Surg*. Published online November 7, 2018. doi:10.1001/jamasurg.2018.4234

### **eTable.** Leftover Opioids by Procedure

This supplementary material has been provided by the authors to give readers additional information about their work.

**eTable. Leftover Opioids by Procedure**

|                                              | Leftover Pills<br>(Median (IQR)) | Total Leftover<br>Pills | Leftover OME<br>(Median (IQR)) | Total Leftover<br>OME |
|----------------------------------------------|----------------------------------|-------------------------|--------------------------------|-----------------------|
| Laparoscopic cholecystectomy                 | 18 (5-28)                        | 10636                   | 100 (35-150)                   | 61529                 |
| Laparoscopic appendectomy                    | 20 (5-29)                        | 4154                    | 100 (37-150)                   | 24858                 |
| Inguinal/femoral hernia repair<br>(open/lap) | 20 (5-29)                        | 11943                   | 100 (25-150)                   | 70170                 |
| Open incisional hernia repair                | 15 (0-30)                        | 2559                    | 90 (0-150)                     | 16209                 |
| Laparoscopic Colectomy                       | 20 (10-30)                       | 2251                    | 114 (50-200)                   | 14109                 |
| Open colectomy                               | 20 (0-30)                        | 1892                    | 111 (0-163)                    | 12626                 |
| Ileostomy/Colostomy                          | 10 (0-27)                        | 859                     | 75 (0-200)                     | 6388                  |
| Small Bowel<br>Resection/Enterolysis         | 15 (0-29)                        | 464                     | 75 (0-150)                     | 2628                  |
| Thyroidectomy                                | 24 (13-30)                       | 877                     | 128 (75-161)                   | 5668                  |
| Vaginal Hysterectomy                         | 19 (5-27)                        | 1870                    | 100 (23-150)                   | 13094                 |
| Laparoscopic/Robotic<br>Hysterectomy         | 20 (5-30)                        | 3804                    | 120 (40-150)                   | 22457                 |
| Abdominal Hysterectomy                       | 15 (0-30)                        | 1383                    | 75 (0-150)                     | 8713                  |
| <b>TOTAL:</b>                                |                                  | <b>42692</b>            |                                | <b>258449</b>         |
